## CORRECTION

# Correction: *In vitro* study of accuracy of subaxial cervical pedicle screw insertion using calipers based on the gravity line

Xiang Yao, Shiqing Liu

An additional affiliation is missing for the first author. Xiang Yao is also affiliated with the Department of Orthopedics, The Affiliated People's Hospital of Jiangsu University, Zhenjiang, Jiangsu Province, PR China.

## Reference

1. Yao X, Liu S (2017) *In vitro* study of accuracy of subaxial cervical pedicle screw insertion using calipers based on the gravity line. PLOS ONE 12(7): e0181324. <https://doi.org/10.1371/journal.pone.0181324>

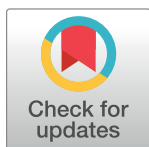

## OPEN ACCESS

**Citation:** Yao X, Liu S (2024) Correction: *In vitro* study of accuracy of subaxial cervical pedicle screw insertion using calipers based on the gravity line. PLoS ONE 19(11): e0314788. <https://doi.org/10.1371/journal.pone.0314788>

**Published:** November 27, 2024

**Copyright:** © 2024 Yao, Liu. This is an open access article distributed under the terms of the [Creative Commons Attribution License](https://creativecommons.org/licenses/by/4.0/), which permits unrestricted use, distribution, and reproduction in any medium, provided the original author and source are credited.
